# Supplementary material
Source: Elsevier journal article supplement (https://www.sciencedirect.com/science/article/pii/S1885585724003311)
Supplement: mmc1 [file mmc1.pdf]

**SUPPLEMENTARY DATA**

**Table 1 of the supplementary data.** Definitions of covariates and clinical outcomes

| <b>Diagnosis</b>        | <b>ICD-10 code</b>                                                                                                                                                                                                                                                                                                                                                                                                                                                                            | <b>Diagnostic definition</b>                                                                                               |
|-------------------------|-----------------------------------------------------------------------------------------------------------------------------------------------------------------------------------------------------------------------------------------------------------------------------------------------------------------------------------------------------------------------------------------------------------------------------------------------------------------------------------------------|----------------------------------------------------------------------------------------------------------------------------|
| Myocardial infarction   | I21, I22, I23                                                                                                                                                                                                                                                                                                                                                                                                                                                                                 | Admission ≥ 1                                                                                                              |
| Ischemic stroke         | I63, I64, G45                                                                                                                                                                                                                                                                                                                                                                                                                                                                                 | Admission ≥ 1                                                                                                              |
| Intracranial hemorrhage | I60-62                                                                                                                                                                                                                                                                                                                                                                                                                                                                                        | Admission ≥ 1 or ER visit ≥ 1                                                                                              |
| GI bleeding             | K22.6, K25.0, K25.2, K25.4, K25.6, K26.0, K26.2, K26.4, K26.6, K27.0, K27.2, K27.4, K27.6, K28.0, K28.2, K28.4, K28.6, K29.0, K62.5, K92.0, K92.1, K92.2                                                                                                                                                                                                                                                                                                                                      | Admission ≥ 1 and ER visit ≥ 1                                                                                             |
| Major bleeding          | Intracranial bleeding or GI bleeding with transfusion                                                                                                                                                                                                                                                                                                                                                                                                                                         | ICH, admission ≥ 1 or ER visit ≥ 1<br>GI bleeding, admission ≥ 1 and RBC transfusion ≥ 1, ER visit ≥ 1 and RBC transfusion |
| Hypertension            | I10-I13, I15                                                                                                                                                                                                                                                                                                                                                                                                                                                                                  | Admission ≥ 1 or outpatient department ≥ 1 within 1 y                                                                      |
| Diabetes mellitus       | E11-E14                                                                                                                                                                                                                                                                                                                                                                                                                                                                                       | Admission or outpatient department ≥ 1 within 1 y                                                                          |
| Dyslipidemia            | E78                                                                                                                                                                                                                                                                                                                                                                                                                                                                                           | Admission or outpatient department ≥ 1 within 1 y                                                                          |
| Liver cirrhosis         | K74, K703                                                                                                                                                                                                                                                                                                                                                                                                                                                                                     | Admission or outpatient department ≥ 1 within 1 y                                                                          |
| Chronic kidney disease  | O7020, O9991, O7075, O3280, V001, V003                                                                                                                                                                                                                                                                                                                                                                                                                                                        | Admission or outpatient department ≥ 1 within 1 y                                                                          |
| Cancer                  | C00- C97                                                                                                                                                                                                                                                                                                                                                                                                                                                                                      | Admission or outpatient department ≥ 1 within 1 y                                                                          |
| Anemia                  | D50, D58, D59, D63, D64                                                                                                                                                                                                                                                                                                                                                                                                                                                                       | Admission or outpatient department ≥ 1 within 1 y                                                                          |
| Thrombocytopenia        | D69                                                                                                                                                                                                                                                                                                                                                                                                                                                                                           | Admission or outpatient department ≥ 1 within 1 y                                                                          |
| <b>Medications</b>      | <b>ATC Codes</b>                                                                                                                                                                                                                                                                                                                                                                                                                                                                              |                                                                                                                            |
| NSAID                   | M01AB16, M03BX, M01AB11, M01AC, M01AE14, M01AB05, S01BC03, M01AX, M01AB08, M01AE04, M01AG03, S01BC04, M01AE01, D10AX, N02BE51, C01EB16, N02BA16, M01AE03, M02AA10, N02AJ14, M01AE17, M01AB15, S01BC05, M01AE, M01AG01, M01AC06, M01AX01, M01AE52, M01AE02, N02CC51, M01AX17, M01AC01, M02AA07, S01BC09, M01AB14, M01AA, N02BA06, M01AB02, M01AC02, M01AE11, M01AG02, M01AC05, M01AX22, L04AK02, M01AB01, M01AE12, M01AB09, M01AE13, M01AB, M01AH, M01AH01, M01AH07, M01AH05, M01AH07, N02BA51 |                                                                                                                            |
| Steroids                | H02AB04, H02BX01, D07AC14, H02AB06, D07AA03, S01BA04, H02AB13, H02AB02, S01CA01, S01CA, S01BA01, S02CA06, R01AD03, D07CC01, H02AB01, D05AX52, H02BX, D07AC01, R01AD05, D07AC09, R03AK07, R03BA02, R03AL11, A07EA06, R03AK12, H02AB09, D11AX, S02CA03, D07AB02, D07CA, D07AA02, H02AB07, R01AD11, D07CB01, H02AB08, S01BA05, D01A, D07AB09                                                                                                                                                     |                                                                                                                            |
| Aspirin                 | B01AC30, B01AC56, N02BA01                                                                                                                                                                                                                                                                                                                                                                                                                                                                     |                                                                                                                            |
| Clopidogrel             | B01AC04, B01AC30                                                                                                                                                                                                                                                                                                                                                                                                                                                                              |                                                                                                                            |

|                        |                                                                                                                                                                                                                                                                                                                                    |
|------------------------|------------------------------------------------------------------------------------------------------------------------------------------------------------------------------------------------------------------------------------------------------------------------------------------------------------------------------------|
| Prasugrel              | B01AC22                                                                                                                                                                                                                                                                                                                            |
| Ticagrelor             | C07AA05                                                                                                                                                                                                                                                                                                                            |
| Beta blocker           | C07AA01-03, C07AA05-07, C07AA12, C07AA14-17, C07AA19, C07AA23, C07AA27, C07AB01-14, C07AG01-02, C07BA02, C07BA05-07, C07BA12, C07BA68, C07BB02-04, C07BB06-07, C07BB12, C07BB52, C07BG01, C07CA02, C07CA03, C07CA17, C07CA23, C07CB03, C07CB02-03, C07CB53, C07CG01, C07DA06, C07DB01, C07FB02-03, C07FB07, C07FB12-13, C07FX01-06 |
| Proton Pump Inhibitors | A02BC51, A02BC, A02BC04, A02BC02, M01AE52, A02BC05, A02BC53, A02BC03, A02BC01, A02BC06, N05AX12, A02BC54, B01AC56, N05AX16                                                                                                                                                                                                         |
| H2 blocker             | A02BA01, A02AH, A02AX, A02BA02, A02BA, A02BA03, A02BA53, A02BA04, A02BA06                                                                                                                                                                                                                                                          |

CT, computed tomography; GI, gastrointestinal; MI, myocardial infarction; MRI, magnetic resonance imaging.

**Table 2 of the supplementary data.** Baseline characteristics of study population before propensity-score matching

|                                            | No therapy<br>(n = 1639) | Antiplatelet therapy<br>(n = 3018) | <i>P</i> | SMD   |
|--------------------------------------------|--------------------------|------------------------------------|----------|-------|
| <i>Age, y</i>                              | 67.2 (9.9)               | 66.0 (9.6)                         | <.001    | 0.118 |
| <i>Sex, male</i>                           | 1077 (65.7)              | 2027 (67.2)                        | .331     | 0.031 |
| <i>Income, medical aid</i>                 | 51 (3.1)                 | 115 (3.8)                          | .252     | 0.038 |
| <i>Residential area, metropolitan</i>      | 1100 (67.1)              | 1985 (65.8)                        | .372     | 0.028 |
| <i>Smoking status (n = 3751)</i>           |                          |                                    | .425     |       |
| Never                                      | 695 (52.3)               | 1232 (50.9)                        |          | 0.027 |
| Former                                     | 380 (28.6)               | 739 (30.5)                         |          | 0.043 |
| Current                                    | 253 (19.0)               | 449 (18.5)                         |          | 0.012 |
| Unknown                                    | 2 (0.2)                  | 1 (0.0)                            |          | 0.035 |
| <i>Heavy alcohol use (n = 3751)</i>        | 78 (5.9)                 | 134 (5.5)                          | .730     | 0.014 |
| <i>BMI (n = 3751)</i>                      |                          |                                    | .468     |       |
| Underweight                                | 19 (1.4)                 | 27 (1.1)                           |          | 0.028 |
| Normal                                     | 375 (28.2)               | 632 (26.1)                         |          | 0.047 |
| Overweight                                 | 355 (26.7)               | 684 (28.3)                         |          | 0.035 |
| Obese                                      | 578 (43.5)               | 1075 (44.4)                        |          | 0.019 |
| Unknown                                    | 3 (0.2)                  | 3 (0.1)                            |          | 0.024 |
| <i>LDL cholesterol, mg/dL (n = 2948)</i>   | 105.6 ± 39.2             | 111.1 ± 44.5                       | .001     | 0.129 |
| <i>HDL cholesterol, mg/dL (n = 2974)</i>   | 51.5 ± 24.6              | 51.5 ± 13.2                        | .984     | 0.001 |
| <i>Total cholesterol, mg/dL (n = 2974)</i> | 184.2 ± 43.2             | 190.5 ± 44.2                       | <.001    | 0.145 |
| <i>Comorbidities</i>                       |                          |                                    |          |       |
| Hypertension                               | 975 (59.5)               | 1684 (55.8)                        | .016     | 0.075 |
| Diabetes mellitus                          | 586 (35.8)               | 894 (29.6)                         | <.001    | 0.131 |

|                                                                          |             |             |       |       |
|--------------------------------------------------------------------------|-------------|-------------|-------|-------|
| Dyslipidemia                                                             | 839 (51.2)  | 1587 (29.6) | .379  | 0.028 |
| Chronic kidney disease                                                   | 27 (1.6)    | 30 (1.0)    | .072  | 0.057 |
| Liver cirrhosis                                                          | 19 (1.2)    | 36 (1.2)    | .999  | 0.003 |
| Cancer                                                                   | 221 (13.5)  | 308 (10.2)  | .001  | 0.102 |
| Anemia                                                                   | 168 (10.3)  | 238 (7.9)   | .007  | 0.082 |
| <i>Long-term NSAID use</i>                                               | 3 (0.2)     | 8 (0.3)     | .814  | 0.017 |
| <i>Long-term steroid use</i>                                             | 6 (0.4)     | 10 (0.3)    | .999  | 0.027 |
| <i>Family history of coronary artery disease (n = 3751)</i>              | 122 (9.2)   | 238 (9.8)   | .551  | 0.022 |
| <i>Concurrent use of proton pump inhibitor and H<sub>2</sub> blocker</i> | 128 (7.8)   | 382 (12.7)  | <.001 | 0.160 |
| <i>Concurrent use of statin</i>                                          | 948 (57.8)  | 2700 (89.5) | <.001 | 0.769 |
| <i>Type of hospital</i>                                                  |             |             |       |       |
| Tertiary hospital                                                        | 1129 (68.9) | 2126 (70.4) | .2675 | 0.034 |
| General hospital / hospital                                              | 510 (31.1)  | 892 (29.6)  |       |       |

BMI, body mass index; HDL, high density lipoprotein; LDL, low density lipoprotein; NSAID, nonsteroidal anti-inflammatory drug; SMD, standardized mean difference.

Values were presented No. (%) or mean  $\pm$  standard deviation.

**Table 3 of the supplementary data.** Baseline characteristics of the study population according to type of antiplatelet agent

|                                                                          | No therapy<br>(n = 1634) | Aspirin<br>(n = 1281) | Clopidogrel<br>(n = 353) | P     | SMD   |
|--------------------------------------------------------------------------|--------------------------|-----------------------|--------------------------|-------|-------|
| <i>Age, y</i>                                                            | 67.2 (9.9)               | 65.6 (10.1)           | 66.6 (10.1)              | <.001 | 0.104 |
| <i>Sex, male</i>                                                         | 1072 (65.6)              | 946 (73.8)            | 267 (75.6)               | <.001 | 0.148 |
| <i>Income, medical aid</i>                                               | 50 (3.1)                 | 49 (3.8)              | 14 (4.0)                 | .457  | 0.033 |
| <i>Residential area, metropolitan</i>                                    | 1097 (67.1)              | 840 (65.6)            | 245 (69.4)               | .363  | 0.055 |
| <i>Smoking status (n = 2628)</i>                                         |                          |                       |                          | .013  |       |
| Never                                                                    | 695 (52.4)               | 458 (44.7)            | 130 (46.9)               |       | 0.102 |
| Former                                                                   | 378 (28.5)               | 339 (33.1)            | 89 (32.1)                |       | 0.007 |
| Current                                                                  | 252 (19.0)               | 227 (22.2)            | 58 (20.9)                |       | 0.052 |
| Unknown                                                                  | 2 (0.2)                  | 0 (0.0)               | 0 (0.0)                  |       | 0.037 |
| <i>Heavy alcohol use (n = 2628)</i>                                      | 78 (5.9)                 | 70 (6.8)              | 11 (4.0)                 | .193  | 0.085 |
| <i>BMI (n = 2628)</i>                                                    |                          |                       |                          | .855  |       |
| Underweight                                                              | 19 (1.4)                 | 17 (1.7)              | 4 (1.4)                  |       | 0.012 |
| Normal                                                                   | 374 (28.2)               | 279 (27.2)            | 72 (26.0)                |       | 0.033 |
| Overweight                                                               | 354 (26.7)               | 282 (27.5)            | 73 (26.4)                |       | 0.018 |
| Obese                                                                    | 577 (43.5)               | 446 (43.6)            | 127 (45.8)               |       | 0.032 |
| Unknown                                                                  | 3 (0.2)                  | 0 (0.0)               | 1 (0.4)                  |       | 0.059 |
| <i>LDL cholesterol, mg/dL (n = 2057)</i>                                 | 105.6 ± 39.3             | 111.3 ± 49.5          | 100.1 ± 36.6             | .001  | 0.176 |
| <i>HDL cholesterol, mg/dL (n = 2080)</i>                                 | 51.5 ± 24.6              | 51.5 ± 13.0           | 50.7 ± 13.9              | .859  | 0.033 |
| <i>Total cholesterol, mg/dL (n = 2080)</i>                               | 184.1 ± 43.2             | 184.11 ± 42.2         | 182.5 ± 51.0             | .007  | 0.109 |
| <i>Comorbidities</i>                                                     |                          |                       |                          |       |       |
| Hypertension                                                             | 973 (59.5)               | 657 (51.3)            | 172 (48.7)               | <.001 | 0.145 |
| Diabetes mellitus                                                        | 582 (35.6)               | 410 (32.0)            | 140 (39.7)               | .014  | 0.107 |
| Dyslipidemia                                                             | 838 (51.3)               | 571 (44.6)            | 148 (41.9)               | <.001 | 0.126 |
| Chronic kidney disease                                                   | 25 (1.5)                 | 15 (1.2)              | 7 (2.0)                  | .477  | 0.044 |
| Liver cirrhosis                                                          | 18 (1.1)                 | 19 (1.5)              | 4 (1.1)                  | .640  | 0.023 |
| Cancer                                                                   | 217 (13.3)               | 168 (13.1)            | 51 (14.4)                | .804  | 0.026 |
| Anemia                                                                   | 165 (10.1)               | 129 (10.1)            | 42 (11.9)                | .571  | 0.039 |
| <i>Long-term NSAIDs use</i>                                              | 3 (0.2)                  | 4 (0.3)               | 0 (0.0)                  | .495  | 0.055 |
| <i>Long-term steroid use</i>                                             | 6 (0.4)                  | 7 (0.5)               | 2 (0.6)                  | .739  | 0.020 |
| <i>Family history of coronary artery disease (n = 2628)</i>              | 122 (9.2)                | 101 (9.9)             | 29 (10.5)                | .75   | 0.052 |
| <i>Concurrent use of proton pump inhibitor and H<sub>2</sub> blocker</i> | 128 (7.8)                | 282 (11.8)            | 100 (16.2)               | <.001 | 0.174 |
| <i>Concurrent use of statin</i>                                          | 943 (57.7)               | 1,142 (89.2)          | 311 (88.1)               | <.001 | 0.507 |
| <i>Type of hospital</i>                                                  |                          |                       |                          |       |       |
| Tertiary hospital                                                        | 1,127 (69.0)             | 903 (70.5)            | 237 (67.1)               | .426  | 0.048 |
| General hospital/hospital                                                | 507 (31.0)               | 378 (29.5)            | 116 (32.9)               |       |       |

BMI, body mass index; HDL, high density lipoprotein; LDL, low density lipoprotein; NSAID: non-steroidal anti-inflammatory drug; SMD, standardized mean difference.

Values are presented as No. (%) or mean (standard deviation).

**Table 4 of the supplementary data.** Comparisons of clinical outcomes according to IPTW analysis

|                                                        | <b>No therapy<br/>(n = 1639)</b> | <b>Antiplatelet<br/>therapy<br/>(n = 3018)</b> | <b>Hazard ratio<br/>(95%CI)<sup>a</sup></b> |
|--------------------------------------------------------|----------------------------------|------------------------------------------------|---------------------------------------------|
| <b>1-Year follow-up</b>                                |                                  |                                                |                                             |
| <i>Major adverse cardiac and cerebrovascular event</i> | 116 (7.1)                        | 208 (6.9)                                      | 1.07 (0.85, 1.35)                           |
| Major adverse cardiac event                            | 114 (7.0)                        | 208 (6.9)                                      | 1.09 (0.86, 1.38)                           |
| All-cause death                                        | 32 (2.0)                         | 37 (1.2)                                       | 0.75 (0.46, 1.22)                           |
| Cardiovascular death                                   | 11 (0.7)                         | 12 (0.4)                                       | 0.70 (0.30, 1.64)                           |
| Myocardial infarction                                  | 36 (2.8)                         | 70 (2.8)                                       | 1.34 (0.64, 2.82)                           |
| Unplanned revascularization                            | 222 (16.3)                       | 409 (15.6)                                     | 1.18 (0.91, 1.55)                           |
| Stroke                                                 | 27 (2.3)                         | 52 (2.4)                                       | 0.89 (0.63, 1.26)                           |
| <i>Safety outcomes</i>                                 | 9 (0.6)                          | 14 (0.5)                                       | 0.96 (0.40, 2.29)                           |
| Any gastrointestinal bleeding                          | 6 (0.4)                          | 13 (0.4)                                       | 1.47 (0.52, 4.18)                           |
| With transfusion                                       | 6 (0.4)                          | 9 (0.3)                                        | 1.02 (0.33, 3.17)                           |
| Without transfusion                                    | 0 (0.0)                          | 5 (0.2)                                        | -                                           |
| Intracranial hemorrhage                                | 4 (0.2)                          | 2 (0.1)                                        | 0.21 (0.03, 1.60)                           |
| Major bleeding <sup>b</sup>                            | 9 (0.6)                          | 10 (0.3)                                       | 0.69 (0.27, 1.78)                           |
| <b>5-Year follow-up</b>                                |                                  |                                                |                                             |
| <i>Major adverse cardiac and cerebrovascular event</i> | 347 (25.5)                       | 588 (22.7)                                     | 0.97 (0.85, 1.11)                           |
| Major adverse cardiac event                            | 343 (25.0)                       | 565 (21.7)                                     | 0.97 (0.85, 1.11)                           |
| All-cause death                                        | 119 (9.1)                        | 171 (7.0)                                      | 0.90 (0.71, 1.15)                           |
| Cardiovascular death                                   | 27 (2.2)                         | 35 (1.4)                                       | 0.75 (0.44, 1.28)                           |
| Myocardial infarction                                  | 11 (0.7)                         | 24 (0.8)                                       | 1.12 (0.74, 1.69)                           |
| Unplanned revascularization                            | 83 (5.1)                         | 169 (5.6)                                      | 1.03 (0.87, 1.22)                           |
| Stroke                                                 | 4 (0.2)                          | 4 (0.1)                                        | 0.93 (0.67, 1.28)                           |
| <i>Safety outcomes</i>                                 | 24 (1.8)                         | 59 (2.5)                                       | 1.59 (0.97, 2.62)                           |
| Any gastrointestinal bleeding                          | 15 (1.2)                         | 43 (1.8)                                       | 2.15 (1.15, 4.02)                           |

|                             |          |          |                    |
|-----------------------------|----------|----------|--------------------|
| With transfusion            | 13 (1.1) | 25 (1.0) | 1.58 (0.77, 3.24)  |
| Without transfusion         | 4 (0.3)  | 22 (1.0) | 4.09 (1.23, 13.61) |
| Intracranial hemorrhage     | 9 (0.6)  | 16 (0.7) | 0.91 (0.39, 2.08)  |
| Major bleeding <sup>b</sup> | 22 (1.7) | 41 (1.6) | 1.24 (0.72, 2.14)  |

95%CI, 95% confidence interval; IPTW, inverse probability treatment weighting.

The cumulative incidence of clinical outcomes is presented as event number and Kaplan-Meier estimates from the index procedure.

<sup>a</sup>Adjusted for discharge medication of proton pump inhibitor/H<sub>2</sub> blocker and statin.

<sup>b</sup>Major bleeding was defined as a composite of intracranial bleeding or gastrointestinal bleeding with documented transfusion.



**Table 5 of the supplementary data.** Comparisons of clinical outcomes according to type of antiplatelet agent

|                                                        | Number of events<br>(cumulative incidence, %) |            |             | Hazard ratio (95%CI) <sup>a</sup> |                           |
|--------------------------------------------------------|-----------------------------------------------|------------|-------------|-----------------------------------|---------------------------|
|                                                        | No therapy                                    | Aspirin    | Clopidogrel | No therapy vs aspirin             | No therapy vs clopidogrel |
| <b>1-year follow-up</b>                                |                                               |            |             |                                   |                           |
| <i>Major adverse cardiac and cerebrovascular event</i> | 115 (7)                                       | 93 (7.3)   | 28 (7.9)    | 1.03 (0.78, 1.35)                 | 1.02 (0.67, 1.56)         |
| Major adverse cardiac event                            | 113 (6.9)                                     | 93 (7.3)   | 28 (7.9)    | 1.05 (0.79, 1.38)                 | 1.04 (0.68, 1.60)         |
| All-cause death                                        | 31 (1.9)                                      | 20 (1.6)   | 5 (1.4)     | 0.83 (0.47, 1.46)                 | 0.43 (0.16, 1.13)         |
| Cardiovascular death                                   | 11 (0.7)                                      | 8 (0.6)    | 1 (0.3)     | 0.97 (0.38, 2.44)                 | 0.79 (0.20, 3.18)         |
| Myocardial infarction                                  | 11 (0.7)                                      | 11 (0.9)   | 1 (0.3)     | 1.10 (0.47, 2.61)                 | 1.26 (0.32, 5.01)         |
| Unplanned revascularization                            | 83 (5.1)                                      | 72 (5.7)   | 23 (6.5)    | 1.11 (0.80, 1.53)                 | 1.17 (0.73, 1.90)         |
| Stroke                                                 | 4 (0.2)                                       | 2 (0.2)    | 2 (0.6)     | 0.88 (0.57, 1.35)                 | 0.95 (0.51, 1.78)         |
| <i>Safety outcomes</i>                                 | 9 (0.6)                                       | 8 (0.6)    | 3 (0.9)     | 1.01 (0.39, 2.64)                 | 0.91 (0.20, 4.14)         |
| Any gastrointestinal bleeding                          | 6 (0.4)                                       | 8 (0.6)    | 2 (0.6)     | 1.68 (0.59, 4.83)                 | 0.86 (0.09, 8.16)         |
| With transfusion                                       | 6 (0.4)                                       | 5 (0.4)    | 2 (0.6)     | 0.97 (0.31, 3.05)                 | 0.99 (0.10, 10.05)        |
| Without transfusion                                    | 0 (0.0)                                       | 1 (0.1)    | 0 (0.0)     | -                                 | -                         |
| Intracranial hemorrhage                                | 4 (0.2)                                       | 0 (0.0)    | 1 (0.3)     | 0 (0, 0)                          | 0.48 (0.16, 1.45)         |
| Major bleeding <sup>b</sup>                            | 9 (0.6)                                       | 5 (0.4)    | 3 (0.9)     | 0.57 (0.19, 1.66)                 | 1.05 (0.23, 4.77)         |
| <b>5-year follow-up</b>                                |                                               |            |             |                                   |                           |
| <i>Major adverse cardiac and cerebrovascular event</i> | 342 (24.7)                                    | 269 (24.3) | 78 (27.1)   | 0.94 (0.80, 1.11)                 | 0.99 (0.77, 1.27)         |
| Major adverse cardiac event                            | 328 (23.7)                                    | 262 (23.5) | 75 (26)     | 0.96 (0.82, 1.14)                 | 1.00 (0.77, 1.29)         |
| All-cause death                                        | 115 (8.8)                                     | 90 (8.6)   | 22 (9.2)    | 0.99 (0.74, 1.31)                 | 0.69 (0.42, 1.14)         |
| Cardiovascular death                                   | 27 (2.2)                                      | 21 (1.9)   | 6 (2.8)     | 0.96 (0.52, 1.78)                 | 0.79 (0.30, 2.10)         |
| Myocardial infarction                                  | 35 (2.7)                                      | 31 (3)     | 4 (1.1)     | 1.03 (0.62, 1.69)                 | 0.66 (0.25, 1.73)         |
| Unplanned revascularization                            | 221 (16.3)                                    | 182 (16.4) | 51 (16.9)   | 1.02 (0.83, 1.24)                 | 1.04 (0.76, 1.43)         |

|                               |          |          |          |                    |                    |
|-------------------------------|----------|----------|----------|--------------------|--------------------|
| Stroke                        | 27 (2.3) | 21 (2.2) | 10 (5)   | 0.85 (0.57, 1.27)  | 1.17 (0.64, 2.12)  |
| <i>Safety outcomes</i>        | 24 (1.8) | 26 (2.5) | 12 (5.5) | 1.48 (0.83, 2.64)  | 2.00 (0.93, 4.33)  |
| Any gastrointestinal bleeding | 15 (1.2) | 17 (1.5) | 7 (2.7)  | 2.03 (1.02, 4.05)  | 2.56 (0.99, 6.64)  |
| With transfusion              | 13 (1.1) | 11 (1)   | 6 (2.2)  | 1.44 (0.64, 3.20)  | 2.57 (0.86, 7.70)  |
| Without transfusion           | 4 (0.3)  | 8 (0.6)  | 3 (1.6)  | 4.30 (1.12, 16.55) | 3.90 (0.76, 20.12) |
| Intracranial hemorrhage       | 9 (0.6)  | 6 (0.6)  | 3 (1.1)  | 0.80 (0.26, 2.41)  | 1.25 (0.30, 5.11)  |
| Major bleeding <sup>b</sup>   | 22 (1.7) | 18 (1.8) | 9 (3.3)  | 1.11 (0.57, 2.13)  | 1.89 (0.81, 4.41)  |

95%CI, 95% confidence interval.

<sup>a</sup> Adjusted for age, sex, comorbidities (hypertension, diabetes mellitus, dyslipidemia), chronic kidney disease, liver cirrhosis, cancer, anemia, thrombocytopenia, long-term nonsteroidal anti-inflammatory drug/steroid and discharge medication of proton pump inhibitor/H<sub>2</sub> blocker and statin.

<sup>b</sup> Major bleeding was defined as a composite of intracranial bleeding or gastrointestinal bleeding with documented transfusion.

**Figure 1 of the supplementary data.** Cumulative incidence of MACCE and gastrointestinal bleeding according to type of antiplatelet agents.

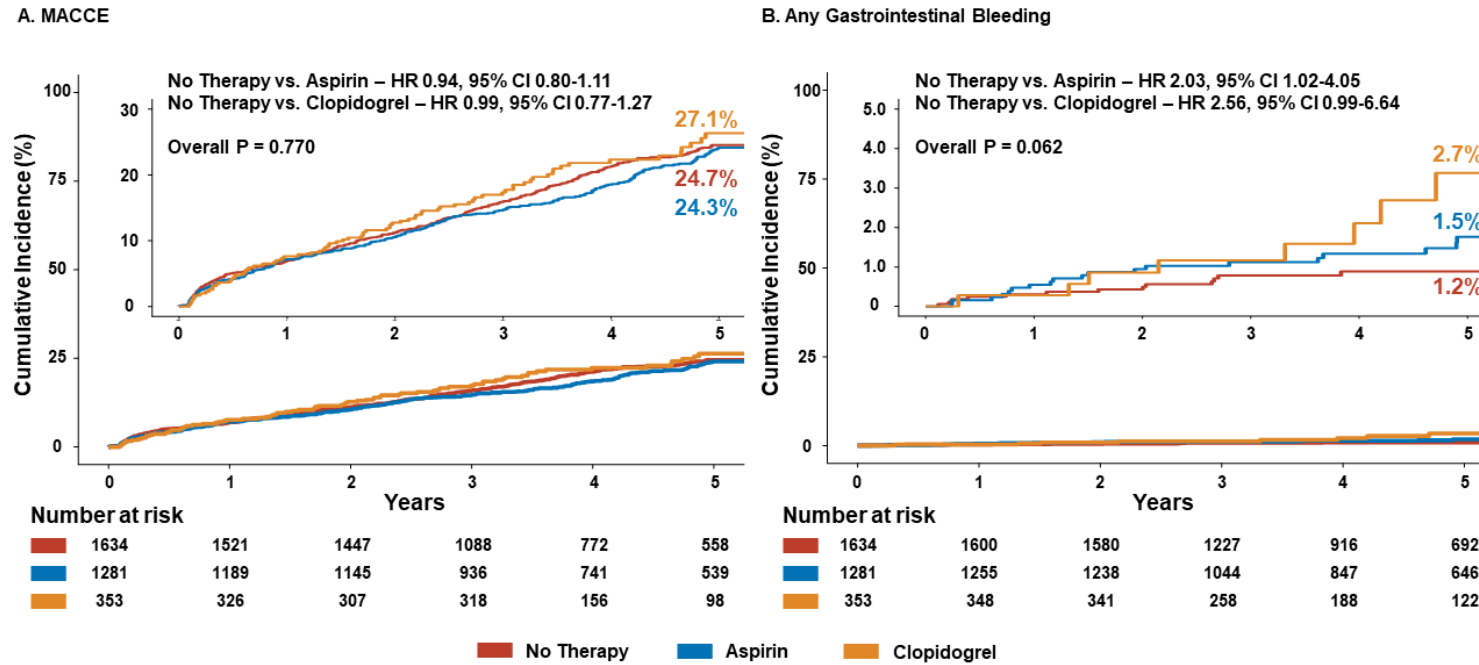

95%CI, 95% confidence interval, HR, hazard ratio; MACCE, major adverse cardiac and cerebrovascular events.

Kaplan-Meier curves and cumulative incidence of (A) MACCE and (B) gastrointestinal bleeding among 3 groups classified according to type of antiplatelet agent (no therapy vs aspirin vs clopidogrel). Hazard ratios were adjusted by age, sex, comorbidities (hypertension, diabetes mellitus, dyslipidemia), chronic kidney disease, liver cirrhosis, cancer, anemia, thrombocytopenia, long-term nonsteroidal anti-inflammatory drug/steroid and discharge medication with proton pump inhibitor/H<sub>2</sub> blocker.
